# Supplementary material for: Contribution to the Knowledge of Dicranoptychini (Diptera, Tipuloidea, Limoniidae) in China, with the First Mitochondrial Genome of the Tribe and Its Phylogenetic Implications
Source: MDPI journal article supplement (doi:10.3390/insects14060535), 2023-06-07
Supplement: s1 [file s1]

**Table S1.** Organization of the mitochondrial genome of *Dicranoptycha shandongensis* sp. nov.

| Gene                           | Direction | Location    | Size<br>(bp) | Anticodon | Codon |      | Intergenic<br>nucleotide* |
|--------------------------------|-----------|-------------|--------------|-----------|-------|------|---------------------------|
|                                |           |             |              |           | Start | Stop |                           |
| <i>tRNA<sup>Ile</sup></i>      | J         | 1-67        | 67           | GAT       |       |      |                           |
| <i>tRNA<sup>Gln</sup></i>      | N         | 65-133      | 69           | TTG       |       |      | -3                        |
| <i>tRNA<sup>Met</sup></i>      | J         | 142-209     | 68           | CAT       |       |      | 8                         |
| <i>ND2</i>                     | J         | 210-1238    | 1029         |           | ATT   | TAA  | 0                         |
| <i>tRNA<sup>Trp</sup></i>      | J         | 1259-1326   | 68           | TCA       |       |      | 20                        |
| <i>tRNA<sup>Cys</sup></i>      | N         | 1319-1387   | 69           | GCA       |       |      | -8                        |
| <i>tRNA<sup>Tyr</sup></i>      | N         | 1398-1462   | 65           | GTA       |       |      | 10                        |
| <i>COI</i>                     | J         | 1461-2996   | 1536         |           | TCG   | TAA  | -2                        |
| <i>tRNA<sup>Leu(UGR)</sup></i> | J         | 3001-3065   | 65           | TAA       |       |      | 4                         |
| <i>COII</i>                    | J         | 3080-3763   | 684          |           | ATG   | TAA  | 14                        |
| <i>tRNA<sup>Lys</sup></i>      | J         | 3768-3838   | 71           | CTT       |       |      | 4                         |
| <i>tRNA<sup>Asp</sup></i>      | J         | 3840-3905   | 66           | GTC       |       |      | 1                         |
| <i>ATP8</i>                    | J         | 3906-4067   | 162          |           | ATT   | TAA  | 0                         |
| <i>ATP6</i>                    | J         | 4061-4738   | 678          |           | ATG   | TAA  | -7                        |
| <i>COIII</i>                   | J         | 4765-5553   | 789          |           | ATG   | TAA  | 26                        |
| <i>tRNA<sup>Gly</sup></i>      | J         | 5554-5618   | 65           | TCC       |       |      | 0                         |
| <i>ND3</i>                     | J         | 5619-5972   | 354          |           | ATT   | TAA  | 0                         |
| <i>tRNA<sup>Ala</sup></i>      | J         | 5979-6043   | 65           | TGC       |       |      | 6                         |
| <i>tRNA<sup>Arg</sup></i>      | J         | 6069-6131   | 63           | TCG       |       |      | 25                        |
| <i>tRNA<sup>Asn</sup></i>      | J         | 6137-6202   | 66           | GTT       |       |      | 5                         |
| <i>tRNA<sup>Ser(AGN)</sup></i> | J         | 6203-6269   | 67           | GCT       |       |      | 0                         |
| <i>tRNA<sup>Glu</sup></i>      | J         | 6272-6339   | 68           | TTC       |       |      | 2                         |
| <i>tRNA<sup>Phe</sup></i>      | N         | 6352-6418   | 67           | GAA       |       |      | 12                        |
| <i>ND5</i>                     | N         | 6422-8155   | 1734         |           | ATG   | TAA  | 3                         |
| <i>tRNA<sup>His</sup></i>      | N         | 8156-8220   | 65           | GTG       |       |      | 0                         |
| <i>ND4</i>                     | N         | 8222-9562   | 1341         |           | ATG   | TAA  | 1                         |
| <i>ND4L</i>                    | N         | 9556-9852   | 297          |           | ATG   | TAA  | -7                        |
| <i>tRNA<sup>Thr</sup></i>      | J         | 9855-9920   | 66           | TGT       |       |      | 2                         |
| <i>tRNA<sup>Pro</sup></i>      | N         | 9921-9988   | 68           | TGG       |       |      | 0                         |
| <i>ND6</i>                     | J         | 9991-10515  | 525          |           | ATC   | TAA  | 2                         |
| <i>CytB</i>                    | J         | 10515-11651 | 1137         |           | ATG   | TAA  | -1                        |
| <i>tRNA<sup>Ser(UCN)</sup></i> | J         | 11659-11725 | 67           | TGA       |       |      | 7                         |
| <i>ND1</i>                     | N         | 11742-12689 | 948          |           | ATG   | TAG  | 16                        |
| <i>tRNA<sup>Leu(CUN)</sup></i> | N         | 12690-12754 | 65           | TAG       |       |      | 0                         |
| <i>12S rRNA</i>                | N         | 12755-14085 | 1331         |           |       |      | 0                         |
| <i>tRNA<sup>Val</sup></i>      | N         | 14086-14157 | 72           | TAC       |       |      | 0                         |
| <i>16S rRNA</i>                | N         | 14158-14945 | 788          |           |       |      | 0                         |
| AT rich region                 | J         | 14946-16157 | 1212         |           |       |      | 0                         |

\* Intergenic nucleotide: minus indicates overlapping between genes.

**Table S2.** Codon usage of the mitochondrial genome of *Dicranoptycha shandongensis* sp. nov.

| Amino acid             | Codon         | N   | RSCU | N+  | RSCU | N-  | RSCU |
|------------------------|---------------|-----|------|-----|------|-----|------|
| Phe(F)                 | <b>UUU(F)</b> | 325 | 1.74 | 189 | 1.77 | 136 | 1.96 |
|                        | <u>UUC(F)</u> | 49  | 0.26 | 25  | 0.23 | 3   | 0.04 |
| Leu <sup>UUR</sup> (L) | <b>UUA(L)</b> | 329 | 2.97 | 233 | 3.68 | 234 | 5.36 |
|                        | UUG(L)        | 74  | 0.67 | 27  | 0.43 | 17  | 0.39 |
| Leu <sup>CUN</sup> (L) | <b>CUU(L)</b> | 125 | 1.13 | 56  | 0.88 | 8   | 0.18 |
|                        | CUC(L)        | 32  | 0.29 | 20  | 0.32 | 0   | 0    |
|                        | <u>CUA(L)</u> | 70  | 0.63 | 39  | 0.62 | 3   | 0.07 |
|                        | CUG(L)        | 34  | 0.31 | 5   | 0.08 | 0   | 0    |
| Ile (I)                | <b>AUU(I)</b> | 259 | 1.77 | 181 | 1.77 | 115 | 2    |
|                        | <u>AUC(I)</u> | 33  | 0.23 | 23  | 0.23 | 0   | 0    |
| Met (M)                | <b>AUA(M)</b> | 158 | 1.55 | 107 | 1.74 | 92  | 1.67 |
|                        | <u>AUG(M)</u> | 46  | 0.45 | 16  | 0.26 | 18  | 0.33 |
| Val (V)                | <b>GUU(V)</b> | 70  | 1.71 | 39  | 1.59 | 44  | 2.23 |
|                        | GUC(V)        | 20  | 0.49 | 14  | 0.57 | 3   | 0.15 |
|                        | <u>GUA(V)</u> | 60  | 1.46 | 43  | 1.76 | 25  | 1.27 |
|                        | GUG(V)        | 14  | 0.34 | 2   | 0.08 | 7   | 0.35 |
| Ser <sup>UCN</sup> (S) | <b>UCU(S)</b> | 69  | 3.02 | 65  | 3.4  | 50  | 3.08 |
|                        | UCC(S)        | 16  | 0.7  | 14  | 0.73 | 2   | 0.12 |
|                        | <u>UCA(S)</u> | 41  | 1.79 | 41  | 2.14 | 17  | 1.05 |
|                        | UCG(S)        | 2   | 0.09 | 2   | 0.1  | 1   | 0.06 |
| Pro (P)                | <b>CCU(P)</b> | 55  | 2.16 | 51  | 2.27 | 22  | 2.59 |
|                        | CCC(P)        | 20  | 0.78 | 14  | 0.62 | 2   | 0.24 |
|                        | <u>CCA(P)</u> | 23  | 0.9  | 22  | 0.98 | 10  | 1.18 |
|                        | CCG(P)        | 4   | 0.16 | 3   | 0.13 | 0   | 0    |
| Thr (T)                | <b>ACU(T)</b> | 66  | 2.08 | 60  | 2.02 | 25  | 2.17 |
|                        | ACC(T)        | 12  | 0.38 | 11  | 0.37 | 3   | 0.26 |
|                        | <u>ACA(T)</u> | 45  | 1.42 | 45  | 1.51 | 16  | 1.39 |
|                        | ACG(T)        | 4   | 0.13 | 3   | 0.1  | 2   | 0.17 |
| Ala (A)                | <b>GCU(A)</b> | 47  | 1.66 | 47  | 1.71 | 44  | 2.48 |
|                        | GCC(A)        | 21  | 0.74 | 21  | 0.76 | 5   | 0.28 |
|                        | <u>GCA(A)</u> | 39  | 1.38 | 38  | 1.38 | 19  | 1.07 |
|                        | GCG(A)        | 6   | 0.21 | 4   | 0.15 | 3   | 0.17 |
| Tyr (Y)                | <b>UAU(Y)</b> | 232 | 1.72 | 86  | 1.54 | 76  | 1.92 |
|                        | <u>UAC(Y)</u> | 38  | 0.28 | 26  | 0.46 | 3   | 0.08 |
| Stop (*)               | <b>UAA(*)</b> | 173 | 1.27 | 52  | 1.37 | 3   | 1.5  |
|                        | UAG(*)        | 99  | 0.73 | 24  | 0.63 | 1   | 0.5  |
| His (H)                | <b>CAU(H)</b> | 68  | 1.6  | 53  | 1.63 | 15  | 2    |
|                        | <u>CAC(H)</u> | 17  | 0.4  | 12  | 0.37 | 0   | 0    |
| Gln (Q)                | <b>CAA(Q)</b> | 83  | 1.5  | 57  | 1.65 | 19  | 1.65 |
|                        | CAG(Q)        | 28  | 0.5  | 12  | 0.35 | 4   | 0.35 |
| Asn (N)                | <b>AAU(N)</b> | 117 | 1.68 | 90  | 1.67 | 61  | 1.91 |

|                        |               |    |      |    |      |    |      |
|------------------------|---------------|----|------|----|------|----|------|
|                        | <u>AAC(N)</u> | 22 | 0.32 | 18 | 0.33 | 3  | 0.09 |
| Lys (K)                | <b>AAA(K)</b> | 76 | 1.54 | 45 | 1.67 | 32 | 1.56 |
|                        | <u>AAG(K)</u> | 23 | 0.46 | 9  | 0.33 | 9  | 0.44 |
| Asp (D)                | <b>GAU(D)</b> | 90 | 1.8  | 44 | 1.69 | 17 | 1.79 |
|                        | <u>GAC(D)</u> | 10 | 0.2  | 8  | 0.31 | 2  | 0.21 |
| Glu (E)                | <b>GAA(E)</b> | 74 | 1.28 | 40 | 1.74 | 21 | 1.31 |
|                        | GAG(E)        | 42 | 0.72 | 6  | 0.26 | 11 | 0.69 |
| Cys (C)                | <b>UGU(C)</b> | 22 | 1.22 | 9  | 1.38 | 25 | 1.85 |
|                        | <u>UGC(C)</u> | 14 | 0.78 | 4  | 0.62 | 2  | 0.15 |
| Trp (W)                | <b>UGA(W)</b> | 72 | 1.76 | 61 | 1.94 | 29 | 1.76 |
|                        | UGG(W)        | 10 | 0.24 | 2  | 0.06 | 4  | 0.24 |
| Arg (R)                | CGU(R)        | 6  | 0.67 | 4  | 0.53 | 3  | 0.6  |
|                        | CGC(R)        | 2  | 0.22 | 1  | 0.13 | 0  | 0    |
|                        | <b>CGA(R)</b> | 24 | 2.67 | 24 | 3.2  | 14 | 2.8  |
|                        | CGG(R)        | 4  | 0.44 | 1  | 0.13 | 3  | 0.6  |
| Ser <sup>AGN</sup> (S) | <b>AGU(S)</b> | 24 | 1.05 | 16 | 0.84 | 27 | 1.66 |
|                        | <u>AGC(S)</u> | 5  | 0.22 | 1  | 0.05 | 0  | 0    |
|                        | AGA(S)        | 17 | 0.74 | 12 | 0.63 | 33 | 2.03 |
|                        | AGG(S)        | 9  | 0.39 | 2  | 0.1  | 0  | 0    |
| Gly (G)                | GGU(G)        | 35 | 0.82 | 17 | 0.57 | 11 | 0.45 |
|                        | GGC(G)        | 11 | 0.26 | 7  | 0.23 | 1  | 0.04 |
|                        | <b>GGA(G)</b> | 78 | 1.84 | 67 | 2.23 | 42 | 1.73 |
|                        | GGG(G)        | 46 | 1.08 | 29 | 0.97 | 43 | 1.77 |

N is the total number of codons used for protein coding genes.  $N^+$  and  $N^-$  are the codon usage numbers of protein coding genes for majority strand and minority strand, respectively. RSCU is the relative synonymous codon usage. The bold font highlights the codon with the highest frequency of use of each amino acid. The underlined font highlights codons that full match the anti codons of the tRNAs.
